# Supplementary material
Source: publisher figshare collection journal article supplement (https://geolsoc.figshare.com/ndownloader/files/25661283)
Supplement: Supplementary file 1 [file 25661283]

## Sheet: quartini-supplementary
List of volcanic sites described in Quartini et al. 2020
Longitude	Latitude	X (km)*	Y (km)**	Name	Type	Sector
-148.449	-83.8495	-350	-570	Lake Whillans	heatflow anomaly (borehole)	Siple Coast
-111.23	-81.8798	-823.722	-320	Mt. CASERTZ	edifice	Siple Coast
-125.486	-82.2742	-684.5	-488	Kamb	edifice	Siple Coast
-112.086	-79.4676	-1063.27	-431.446	WDS	heatflow anomaly (ice core)	WAIS Divide
-111.333	-78.416	-1176.24	-459.377	Mt. Thiel	edifice	WAIS Divide
-126.46	-77.65	-1083.25	-800.391	ECR SV	edifice	Marie Byrd Land
-96.1768	-74.6911	-1663.2	-180	Mt. Hudson	ash layer	Amundsen
-118.062	-78.0681	-1148	-612	L'	edifice	WAIS Divide
-118.283	-78.2299	-1130	-608	M'	edifice (inactive)	WAIS Divide
-118.242	-77.9449	-1158	-622	H	fissure	WAIS Divide
-113.168	-78.5739	-1145	-490	A'	edifice (inactive)	WAIS Divide
-114.522	-79.1192	-1078.7	-492.102	C'	edifice	WAIS Divide
-116.421	-80.1776	-958	-476	Mt Resnik	edifice (inactive)	WAIS Divide
-117.883	-80.1833	-945	-500	West Resnik	edifice (unknown)	WAIS Divide
-103.124	-78.2285	-1249.82	-291.383	Thwaites A	heatflow anomaly (radar)	Amundsen
-104.52	-77.9283	-1274.26	-330.01	Thwaites B	heatflow anomaly (radar)	Amundsen
-108.681	-78.7689	-1159.57	-392.056	Thwaites C	heatflow anomaly (radar)	WAIS Divide
-111.333	-78.416	-1176.24	-459.377	Thwaites D	heatflow anomaly (radar)	WAIS Divide
-115.859	-76.6672	-1309.27	-634.579	Thwaites E	heatflow anomaly (radar)	Amundsen
-117.085	-76.5663	-1305.28	-667.505	Thwaites F	heatflow anomaly (radar)	Amundsen
-100.894	-79.2241	-1152.99	-221.899	Thwaites G	heatflow anomaly (radar)	Amundsen
-110.512	-76.316	-1398.93	-523.361	Thwaites H	heatflow anomaly (radar)	Amundsen
-112.163	-76.7304	-1341.01	-546.232	Thwaites I	heatflow anomaly (radar)	Amundsen
-123.083	-76.5919	-1226.02	-798.707	Thwaites J	heatflow anomaly (radar)	Amundsen
* Easting and **Northing coordinates in Polar Stereographic 71
